# Supplementary material for: Association of body shape with amount of Arabian genetic contribution in the Lipizzan horse
Source: Copernicus journal article supplement (doi:10.5194/aab-61-79-2018), 2018-02-07
Supplement: Supplementary file 1 [file aab-61-79-2018-supplement.zip]

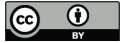

## *Supplement of*

# **Association of body shape with amount of Arabian genetic contribution in the Lipizzan horse**

**Thomas Druml et al.**

*Correspondence to:* Thomas Druml ([thomas.druml@vetmeduni.ac.at](mailto:thomas.druml@vetmeduni.ac.at))

- [aab-61-79-2018-supplement-title-page.pdf](#)
- [supplements](#)
  - [suppl\\_file\\_1.doc](#)
  - [suppl\\_table1.doc](#)

The copyright of individual parts of the supplement might differ from the CC BY 4.0 License.
